# Supplementary material for: Non-invasive detection of somatic mutations using next-generation sequencing in primary central nervous system lymphoma
Source: PubMed Central journal article supplement (PMC5564634; doi:10.18632/oncotarget.18325), 2017-06-01
Supplement: oncotarget-08-48157-s001.pdf [file oncotarget-08-48157-s001.pdf]

# **Non-invasive detection of somatic mutations using next-generation sequencing in primary central nervous system lymphoma**

## **SUPPLEMENTARY MATERIALS**

**Supplementary Table 1: Tumor DNA and circulating DNA sequencing results, n=25**

**See Supplementary File 1**

Supplementary Table 2: The Lymphopanel

| Gene                     | Transcript reference | Hotspot/exons partially sequenced         | Chromosomal location | Size sequenced (bp) |
|--------------------------|----------------------|-------------------------------------------|----------------------|---------------------|
| <i>B2M</i>               | NM_000633            | Hotspots exons 1 & 2, exon 3              | 15q21.1              | 360                 |
| <i>BCL2</i>              | NM_004048            | Hotspot exon 2                            | 18q21.33             | 585                 |
| <i>BRAF</i>              | NM_004333            | Exon 15                                   | 7q34                 | 119                 |
| <i>CARD11</i>            | NM_032415            | Coiled-coil domain exons 4-9              | 7p22.2               | 1121                |
| <i>CD58</i>              | NM_001779            | Exons 1-6                                 | 1p13.1               | 753                 |
| <i>CD79A</i>             | NM_001783            | ITAM domain exons 4 & 5                   | 19q13.2              | 183                 |
| <i>CD79B</i>             | NM_000626            | ITAM domain exons 5 & 6                   | 17q23.3              | 141                 |
| <i>CDKN2A</i>            | NM_058197            | Exons 1, 2A, 2B, 3, 4 & 5                 | 9p21.3               | 1,737               |
| <i>CDKN2B</i>            | NM_004936            | Exons 1A, 1B & 2                          | 9p21.3               | 1289                |
| <i>CIITA</i>             | NM_000246            | Exons 1-19                                | 16p13.13             | 3393                |
| <i>CREBBP</i>            | NM_004380            | Exons 1-31                                | 16p13.3              | 7323                |
| <i>EP300</i>             | NM_001429            | Exons 1-31                                | 22q13.2              | 7245                |
| <i>EZH2</i>              | NM_001203247         | SET domain, hotspots exon 16 & 18         | 7q36.1               | 177                 |
| <i>FOXO1</i>             | NM_002015            | Hotspots exon 1 & FH domain exon 2        | 13q14.11             | 780                 |
| <i>GNA13</i>             | NM_006572            | Exons 1-4                                 | 17q24.1              | 1134                |
| <i>ID3</i>               | NM_002167            | Exons 1 & 2                               | 1p36.12              | 360                 |
| <i>IRF4/MUM1</i>         | NM_002460            | Exons 2-9                                 | 6p25.3               | 1356                |
| <i>ITPKB</i>             | NM_002221            | Exons 2-8                                 | 1q42.12              | 2830                |
| <i>KMT2D/MLL2</i>        | NM_003482            | Exons 1-54                                | 12q13.12             | 16614               |
| <i>MEF2B</i>             | NM_005919            | Exons 2-9                                 | 19p13.11             | 1107                |
| <i>MFHAS1</i>            | NM_004225            | Exons 1-3                                 | 8p23.1               | 3159                |
| <i>MYC</i>               | NM_002467            | Exons 1-3                                 | 8q24.21              | 1365                |
| <i>MYD88</i>             | NM_001172567         | Exons 2-5                                 | 3p22.2               | 587                 |
| <i>NOTCH1</i>            | NM_017617            | PEST domain exon 34                       | 9q34.3               | 1488                |
| <i>NOTCH2</i>            | NM_024408            | Exons 26-28 & 34 (HD/PEST domains)        | 1p12-p11.2           | 2091                |
| <i>PIM1</i>              | NM_001243186         | Exons 1-6                                 | 6p21.2               | 942                 |
| <i>PRDM1/<br/>BLIMP1</i> | NM_001198            | Exons 1-7                                 | 6q21                 | 2478                |
| <i>SOCS1</i>             | NM_003745            | Exon 2                                    | 16p13.13             | 636                 |
| <i>STAT6</i>             | NM_001178078         | Exons 9-14 (DNA binding domain hotspot)   | 12q13.3              | 795                 |
| <i>TCF3</i>              | NM_001136139         | B-HLH domain of E47 isoform exons 17 & 18 | 19p13.3              | 370                 |
| <i>TNFAIP3</i>           | NM_001270507         | Exons 2-9                                 | 6q23.3               | 2373                |
| <i>TNFRSF14</i>          | NM_003820            | Exons 1-8                                 | 1p36.32              | 852                 |
| <i>TP53</i>              | NM_000546            | Mutation hotspots exons 4-10              | 17p13.1              | 1004                |
| <i>XPO1</i>              | NM_003400            | Exons 15-18                               | 2p15                 | 640                 |

Supplementary Table 3: Dilution test for *MYD88* c.T778C

| Experiment | Tested VAF | Number of mutated reads (c.T778C) | Number of all reads | VAF (%) | Interpretation |
|------------|------------|-----------------------------------|---------------------|---------|----------------|
| No 1       | 1%         | 491                               | 64825               | 0.75%   | Pos            |
|            | 0.50%      | 47                                | 8942                | 0.53%   | Pos            |
|            | 0.10%      | 11                                | 10361               | 0.11%   | Pos            |
|            | 0.05%      | 15                                | 16220               | 0.09%   | Pos            |
|            | 0%         | 5                                 | 19895               | 0.03%   | Pos            |
| No 2       | 1%         | 228                               | 33807               | 0.67%   | Pos            |
|            | 0.50%      | 45                                | 8910                | 0.50%   | Pos            |
|            | 0.10%      | 4                                 | 3739                | 0.11%   | Pos            |
|            | 0.05%      | 0                                 | 2200                | 0%      | Neg            |
|            | 0%         | 1                                 | 5034                | 0.02%   | Pos            |
| No 3       | 1%         | 279                               | 24184               | 1.15%   | Pos            |
|            | 0.50%      | 42                                | 9192                | 0.46%   | Pos            |
|            | 0.10%      | 0                                 | 3778                | 0%      | Neg            |
|            | 0.05%      | 3                                 | 2451                | 0.12%   | Pos            |
|            | 0%         | 2                                 | 5208                | 0.04%   | Pos            |
| No 4       | 1%         | 71                                | 8102                | 0.88%   | Pos            |
|            | 0.50%      | 21                                | 5109                | 0.41%   | Pos            |
|            | 0.10%      | 7                                 | 3046                | 0.23%   | Pos            |
|            | 0.05%      | 4                                 | 2330                | 0.17%   | Pos            |
|            | 0%         | 0                                 | 3625                | 0%      | Neg            |
| No 5       | 1%         | 62                                | 10145               | 0.61%   | Pos            |
|            | 0.50%      | 15                                | 2059                | 0.73%   | Pos            |
|            | 0.10%      | 0                                 | 1112                | 0%      | Neg            |
|            | 0.05%      | 1                                 | 416                 | 0.24%   | Pos            |
|            | 0%         | 0                                 | 443                 | 0%      | Neg            |
| No 6       | 1%         | 106                               | 9578                | 1.11%   | Pos            |
|            | 0.50%      | 13                                | 1821                | 0.71%   | Pos            |
|            | 0.10%      | 2                                 | 1165                | 0.17%   | Pos            |
|            | 0.05%      | 0                                 | 569                 | 0%      | Neg            |
|            | 0%         | 0                                 | 956                 | 0%      | Neg            |
